# ***cfrB*, *cfrC*, and a potential new *cfr*-like gene in *Clostridium difficile* strains recovered across Latin America**

Vanja Stojković<sup>1</sup>, María Fernanda Ulate<sup>2</sup>, Fanny Hidalgo-Villeda<sup>3</sup>, Emmanuel Aguilar<sup>4</sup>, Camilo Monge-Cascante<sup>2</sup>, Marjorie Pizarro-Guajardo<sup>6,7</sup>, Kaitlyn Tsai<sup>1</sup>, Edgardo Tzoc<sup>3</sup>, Margarita Camorlinga<sup>5</sup>, Daniel Paredes-Sabja<sup>6,7</sup>, Carlos Quesada-Gómez<sup>2</sup>, Danica Galonić Fujimori<sup>1,8</sup>, César Rodríguez<sup>2\*</sup>

<sup>1</sup>Department of Cellular and Molecular Pharmacology, University of California San Francisco, USA

<sup>2</sup>CIET and Facultad de Microbiología, Universidad de Costa Rica, Costa Rica

<sup>3</sup>Escuela de Microbiología, Facultad de Ciencias, Universidad Nacional Autónoma de Honduras, Honduras

<sup>4</sup>Medical Bacteriology, Department of Microbiology. Escuela Nacional de Ciencias Biológicas del Instituto Politécnico Nacional (ENCB-IPN), México.

<sup>5</sup>Unidad de Investigación en Enfermedades Infecciosas y Parasitarias. Instituto Mexicano del Seguro Social, México

<sup>6</sup>Microbiota-Host Interactions and Clostridia Research Group, Facultad Ciencias de la Vida, Universidad Andres Bello, Chile

<sup>7</sup>Millennium Nucleus in the Biology of Intestinal Microbiota, Santiago, Chile

<sup>8</sup>Department of Pharmaceutical Chemistry, University of California San Francisco, USA

\*Correspondence author: Dr. César Rodríguez Sánchez, Centro de Investigación en Enfermedades Tropicales (CIET) and Facultad de Microbiología, Universidad de Costa Rica, Ciudad Universitaria Rodrigo, San José 11501-2060, Costa Rica; Tel: +506 2511-8615 Fax: +506 2225-4384. Email: [cesar.rodriguezsanchez@ucr.ac.cr](mailto:cesar.rodriguezsanchez@ucr.ac.cr)

## 25 ABSTRACT

26 Cfr is a radical S-adenosyl-L-methionine (SAM) enzyme that confers cross-resistance to all antibiotics  
 27 targeting the large ribosomal subunit through hypermethylation of nucleotide A2503 of 23S rRNA. Of  
 28 the four known *cfr* genes known to date, *cfr*(B) and *cfr*(C) have been sporadically found in *C. difficile*,  
 29 yet functional characterization of *cfr*(C) is still lacking. We identified genes for putative Cfr-like enzymes  
 30 among clinical *C. difficile* strains from Mexico, Honduras, Costa Rica, and Chile. To confirm their  
 31 identity and activity, we obtained minimum inhibitory concentrations for ribosome-targeting antibiotics,  
 32 annotated whole genome sequences, and performed a functional characterization of Cfr(C). The seven  
 33 representative isolates analyzed displayed different levels of resistance to PhLOPS<sub>A</sub> antibiotics in the  
 34 absence of the ribosome protection factor OptrA, and mutations in genes for 23S rRNAs or the  
 35 ribosomal proteins L3 and L4. *cfr*(B) was detected in four isolates as part of a Tn6218-like transposon  
 36 or an un-described mobile genetic element. In turn, *cfr*(C) was found integrated into an ICE-element.  
 37 One isolate harbored a putative *cfr*-like gene that shows only 51-58% of sequence identity to Cfr and  
 38 known Cfr-like enzymes. Moreover, our *in vitro* assays confirmed that Cfr(C) methylates *E. coli* and *C.*  
 39 *difficile* 23S rRNA fragments. These results indicate selection of *cfr*-like genes in *C. difficile* from Latin  
 40 America, suggest that the diversity of *cfr*-like resistance genes is larger than anticipated, and provide  
 41 the first assessment of the methylation activity of Cfr(C).

42

## 43 KEYWORDS

44 *C. difficile*, Cfr, Cfr(B), Cfr(C), 23S rRNA methylation, PhLOPS<sub>A</sub>

## 45 1. Introduction

46 The bacterial ribosome is one of the most common targets for antibiotics of clinical and veterinary  
 47 relevance. Resistance to ribosome-targeting antibiotics occurs primarily through modification of drug's  
 48 binding sites, specifically through mutation or modification of ribosomal RNA (rRNA) or ribosomal  
 49 proteins<sup>1</sup>. Several rRNA modifying enzymes implicated in antibiotic resistance have been discovered<sup>2</sup>,  
 50 and among them, the radical SAM enzyme Cfr is noteworthy because it provides cross-resistance to  
 51 Phenicol (e.g. thiamphenicol), Lincosamides (e.g. clindamycin), Oxazolidinones (e.g. linezolid),  
 52 Pleuromutilins (e.g. tiamulin), and Streptogramin A (e.g. dalfopristin) through C8 methylation of the  
 53 A2503 residue in 23S rRNA (*E. coli* numbering), which is located in the peptidyl transferase center  
 54 (PTC)<sup>3</sup>. In addition to this so-called PhLOPS<sub>A</sub> phenotype<sup>4</sup>, Cfr-mediated methylation leads to  
 55 resistance to 16-member macrolides, the aminocyclitol hygromycin A, and the nucleoside antimicrobial  
 56 agent A201A<sup>4-6</sup>.

57 *cfr* and *cfr*-like genes are typically found on mobile genetic elements (MGEs). Moreover, since  
 58 acquisition of *cfr* exhibits low fitness costs<sup>7</sup>, the spread of these resistance genes threatens the utility of  
 59 PTC-targeting antibiotics in the clinic. The *cfr* gene was first discovered on a *Staphylococcus sciuri*  
 60 plasmid<sup>8</sup>, but it is now found in nearly twenty different molecular contexts in isolates of *Enterococcus*,  
 61 *Bacillus*, *Proteus vulgaris*, *Escherichia coli*, *Macrococcus caseolyticus*, *Jeotgaliococcus pinnipedialis*,  
 62 and *Streptococcus suis* from Europe, Latin America, USA, and Asia<sup>3</sup>. Homologues of *cfr* have been  
 63 identified in non-pathogenic Bacillales<sup>9</sup> and three additional *cfr*-like genes sharing less than 80%  
 64 protein sequence identity to Cfr have been described in *Clostridium* and *Enterococcus* [3]. These genes  
 65 are known as *cfr*(B), *cfr*(C), and *cfr*(D).

66 In *C. difficile*, *cfr*(B) was first detected in strain 11140508 contained within Tn6218-like elements<sup>10,11</sup>.  
 67 Afterwards, Candela *et al.* defined *cfr*(C) after analysis of *C. difficile* T10 and found it in three types of  
 68 integrative and conjugative elements (ICEs) in several other strains, including the non-toxigenic strain  
 69 *C. difficile* F548<sup>12</sup>. Subsequently, Hansen and Vester demonstrated by primer extension that a codon-  
 70 optimized version of *cfr*(B) of *C. difficile* 11140508 modifies A2503 in 23S rRNA when expressed in *E.*

71 *coli*<sup>13</sup>. Equivalent functional evidence is missing for Cfr(C), though it has been shown to confer  
 72 PhLOPS<sub>A</sub> resistance upon introduction into the linezolid-susceptible strain *C. difficile* 630Δ*erm*<sup>12</sup>.  
 73 Linezolid is not used to treat *C. difficile* infections (CDI) despite its confirmed utility to prevent CDI in  
 74 patients with ventilator associated pneumonia<sup>14</sup> and to reduce *C. difficile* toxin gut levels in a mice  
 75 model<sup>15</sup>. Moreover, the closely related antibiotic cadazolid inhibits moxifloxacin-resistant *C. difficile*  
 76 NAP1/027 strains without affecting gut commensals,<sup>16</sup> and though it did not pass a Phase III trial<sup>17</sup>,  
 77 novel oxazolidinones to treat *C. difficile* infections may appear in the future.  
 78 Based on this potential utility of oxazolidinones in treating CDI and the current use of linezolid to treat  
 79 infections caused by anaerobic bacteria in Mexico and Honduras (personal communication), we  
 80 investigated seven clinical *C. difficile* isolates from Latin America that circulated between 2009 and  
 81 2016 to determine whether they carry functional *cfr* or *cfr*-like genes. To this end, we obtained minimum  
 82 inhibitory concentrations (MICs) for several PTC-targeting antibiotics, analyzed draft whole genome  
 83 sequences (WGS), and evaluated the *in vitro* activity of the Cfr(C) enzyme detected in two clinical  
 84 isolates.

85

## 86 **2. Methods**

### 87 2.1. Strains

88 This study included ribotype- or PFGE-confirmed NAP1/027/ST01 clinical isolates from Mexico (DF11),  
 89 Honduras (HON06, HON10, HON11) and Chile (PUC51, PUC347), and one isolate from the  
 90 NAP<sub>CR1</sub>/012/ST54 genotype from Costa Rica (LIBA5707). These bacteria were recovered between  
 91 2009-2016 from stool samples of human patients and represent strains that were shown by automated  
 92 annotation of WGS to carry sequences for potential Cfr enzymes (<sup>18,19</sup>, and unpublished data). With a  
 93 single exception (DF11, recovered from a 3-years old patient), all isolates were obtained from adults  
 94 with active diarrhea compatible with CDI. DF, PUC, and LIBA isolates were obtained during confirmed  
 95 CDI outbreaks. The linezolid-susceptible strain LIBA5701 was used as a negative control in the

determinations of minimum inhibitory concentrations (MIC) because it is a NAP<sub>CR1</sub> strain that lacks *cfr*-like genes (see below)<sup>18</sup>.

## 2.2. MIC determinations

MIC of clindamycin and linezolid were obtained for isolates from México (DF), Honduras (HON) and Costa Rica (LIBA) using E-test strips containing a 0.16 to 256 µg/ml concentration gradient (BioMerieux). This isolate subset was also analyzed by agar microdilution<sup>20</sup> using brain heart infusion plates containing 1-256 µg/ml of tiamulin or thiamphenicol. The susceptibility of the Chilean isolates (PUC) to linezolid, tiamulin, and thiamphenicol was assessed using agar macrodilution with brain heart infusion plates containing 1-256 µg/ml of the corresponding antibiotics. *C. difficile* ATCC 70057 (linezolid<sup>s</sup>) was tested in parallel for quality control purposes.

## 2.3. Comparative genomics

WGS were obtained by sequencing-by-synthesis using multiplexed paired-end libraries and Illumina HiSeq2000 or Miseq platforms. After trimming with sickle (<https://github.com/najoshi/sickle>), reads were assembled using Spades v.3.12<sup>21</sup>. For automated annotation we used Prokka v. 1.13<sup>22</sup>. Regions of interest were trimmed and reannotated using BLAST, BLASTP, eggNOG<sup>23</sup> and UniProt searches. Resistance genes were identified manually or with the CARD database v.3.0.1<sup>24</sup>. Megablast searches against the NCBI *nr* database were used to identify sequences resembling the MGEs here defined. All genomes and genome comparisons were visualized in Artemis or ACT, respectively. Linear comparison figures were prepared with Easyfig. The presence of SNPs or indels in genes encoding linezolid binding sites<sup>25</sup>, including genes from 23 rRNAs and the ribosomal proteins L3 and L4, was checked in all isolates through bwa mapping of trimmed reads to WGS from the reference strains R20291 (accession number FN545816) or CD630 (accession number AM180355). Trimmed reads and assemblies for the DF and HON isolates can be downloaded from the MicrobesNG portal (<https://microbesng.uk/portal/projects/405FF6AC-A5E0-E04A-AECF-A5C9371B8B60/>). Sequencing data for LIBA5707 is available at the European Nucleotide Archive (run ERR467555). Data for PUC51 and PUC347 can be retrieved using the accession numbers ERZ816937 and ERZ816944, respectively.

## 122 2.4. Comparison of RlmN and Cfr protein sequences

123 Though both RlmN and Cfr modify A2503, the former is a housekeeping gene and the latter an acquired  
124 antibiotic resistance gene<sup>26</sup>. To examine the relationship between putative Cfr sequences mentioned in  
125 this paper to other Cfr and RlmN sequences, we performed a phylogenetic analysis. To this end, Cfr-  
126 like and RlmN-like orthologs from selected Firmicutes species (Supplementary Table 2) were retrieved  
127 from the Integrated Microbial Genomes-Joint Genome institute (IMG/JGI) database by BLAST using the  
128 RlmN sequence from *Bacillus subtilis* as a query, as done in<sup>27</sup>. Additional RlmN/Cfr paralogous  
129 sequences from *Paenibacillus durus* were retrieved from the NCBI. These sequences were aligned  
130 using MUSCLE<sup>28</sup>, prior to the generation of phylogenetic tree by PhyML with the Akaike Information  
131 Criterion for model selection<sup>29</sup>.

## 132 2.5. Expression and purification of Cfr(C)

133 A codon optimized sequence of *cfr(C)* was cloned into the pET21a vector and overexpressed in  
134 *Escherichia coli* BL21-CodonPlus (DE3)-RIPL as described previously<sup>26,30,31</sup>. The resulting enzyme was  
135 then purified by Talon chromatography (Clontech) and underwent iron-sulfur cluster reconstitution using  
136 previously published protocols<sup>26,30,31</sup>.

## 137 2.6. Preparation of truncated rRNA substrates for the *in vitro* methylation assay

138 The *E. coli* 23S rRNA fragment 2447-2625 used in the *in vitro* methylation assay (see below) was  
139 generated by *in vitro* transcription following a previously published protocol<sup>26,30</sup>. *C. difficile* 23S rRNA  
140 fragments 2451-2629 and 2022-2629 were generated by *in vitro* transcription in the same manner but  
141 using different PCR products as templates. Briefly, forward PCR primers contained the T7 RNA  
142 polymerase promoter sequence TAATACGACTCACTATAGG, followed by several nucleotides  
143 corresponding to specific region of *C. difficile* 23S rRNA. 23S rRNA fragments were amplified using  
144 genomic *C. difficile* DNA purchased from the American Type Culture Collection as template.

## 145 2.7. *In vitro* methylation assay

146 *In vitro* reactions were performed in 100  $\mu$ L volumes under the following conditions: 100 mM HEPES pH  
147 8.0, 100 mM KCl, 10 mM MgCl<sub>2</sub>, 2 mM DTT, 20  $\mu$ M Flavodoxin, 2  $\mu$ M Flavodoxin reductase, 4  $\mu$ M RNA

and 0.14  $\mu\text{Ci}$  [ $^{14}\text{C}$ -methyl]-SAM (58 mCi/mmol) and 5-10  $\mu\text{M}$  purified enzyme. Reactions were initiated by addition of 1 mM NADPH (final concentration) and were allowed to proceed at 37°C for 1.5 h. The RNA was recovered from the reaction mixtures using the RNA Clean & Concentrator kit (Zymo Research) and added to vials containing Ultima Gold scintillation fluid (Perkin Elmer). The amount of radioactivity incorporated in the product was measured using a Beckman–Coulter LS6500 multipurpose scintillation counter (Fullerton, CA, USA). Each value represents the average of at least duplicate measurements, with one standard deviation (SD) indicated.

## 2.8. HPLC separation and identification of methylated adenosines

Purified, methylated rRNA from *in vitro* reactions was enzymatically digested to mononucleosides using nuclease  $\text{P}_1$  (Sigma-Aldrich), snake venom phosphodiesterase (Sigma-Aldrich), and alkaline phosphatase from calf intestine (New England Biolabs) as described before<sup>26,30</sup>. The digested samples were separated by HPLC using a Luna analytical C18 column (10  $\mu\text{m}$ , 4.6 mm  $\times$  250 mm) (Phenomenex, Torrance, CA, USA) and a previously published protocol<sup>26,30</sup>. Mononucleosides and synthetic methyladenosine standards were detected by their UV absorption at 256 nm, while the  $^{14}\text{C}$ -labeled methyladenosines were detected with a Packard radiomatic 515TR flow scintillation analyzer (Perkin Elmer).

## **3. Results**

### 3.1. Detection of *cfr*-like genes

Isolates HON06, HON11, PUC51, and PUC347 carry a *cfr*(B) gene identical to that of *C. difficile* 11140508 (Table 1). On the other hand, isolates HON10 and LIBA5707 have the *cfr*(C) allele previously seen in *C. difficile* T10 (Table 1). Interestingly, the genome of isolate DF11 includes a gene for a radical SAM RNA methylating enzyme that only shares 51-58% identity with *cfr*, *cfr*(B), *cfr*(C), and *cfr*(D) and therefore might represent a new *cfr*-like gene according to the MLS nomenclature system maintained by Dr. Marilyn Roberts (Table 1). In congruence with this classification, the predicted protein sequence of the putative *cfr*-like gene of DF11 shows homology to C8 RNA methylating enzymes deposited in the BLASTp, EggNOG, UniProt, and SFLD databases (Supplementary Table 1). Cfr(B) and Cfr(D) form a

175 cluster with functional Cfr enzymes. By contrast, Cfr(C) and the product of the putative *cfr*-like gene  
 176 from isolate DF11 appear in a group of Cfr-like proteins that clades with Cfr sequences awaiting  
 177 functional characterization (Figure 1).

178 All *cfr*-like genes detected were found on four types of putative MGEs with anticipated mobilization or  
 179 conjugation potential (Table 2). In detail, while isolates HON06 and HON11 have *cfr*(B) within a  
 180 Tn6218-like element, isolates PUC51 and PUC347 have *cfr*(B) elsewhere in their genomes in an  
 181 undescribed genetic structure (Table 2). The best hit for this novel MGE in a megablast search against  
 182 the nr database was a genomic fragment of *Faecalibacterium prausnitzii* L2/6 (Query cover=74%, E-  
 183 value=0, Identity=99%); a species that has not been previously reported to carry *cfr*-like genes. The  
 184 *cfr*(C) genes of isolates HON10 and LIBA5707, in turn, were traced back to a MGE sharing similarity  
 185 with the ICEs of *C. difficile* F548<sup>12</sup> (Table 2). The putative new *cfr*-like gene of isolate DF11 was found  
 186 integrated into a distinct MGE that shows partial hits to genomic sequences of various intestinal  
 187 Firmicutes (Table 2), including *Lachnoclostridium* sp. YL32 (Query cover=60%, E-value=0,  
 188 Identity=94%), *Roseburia intestinalis* XB6B4 (Query cover=60%, E-value=0, Identity=92%),  
 189 *Faecalibacterium prausnitzii* A2165 (Query cover=60%, E-value=0, Identity=88%), and *C. difficile* Z31  
 190 (Query cover=60%, E-value=0, Identity=87%). In this case, the shared regions were concentrated at the  
 191 5' and 3' ends of the element and did not include the putative *cfr*-like gene or their immediate  
 192 neighboring genes (Table 2). None of the WGS studied showed mutations or indels in 23S RNA genes,  
 193 the ribosomal proteins L3 and L4, or presence of OptrA, which are mechanisms known to lead to a  
 194 PhLOPS<sub>A</sub> phenotype.

### 195 3.2 MIC

196 To evaluate whether the presence of *cfr*-like genes in clinical isolates leads to PhLOPS<sub>A</sub> phenotype we  
 197 performed susceptibility tests to several PTC-targeting antibiotics. As a negative control we used  
 198 NAP<sub>CR1</sub> strain LIBA5701, which lacks *cfr*-like genes and thus does not exhibit PhLOPS<sub>A</sub> phenotype  
 199 (Table 3). Isolates HON06 and HON11, which carry *cfr*(B) in a Tn6218-like context, and HON10 and  
 200 LIBA5707, which is positive for *cfr*(C), exhibited an 8-24 fold increase in the MIC of linezolid and ≥128  
 201 fold increase in the MIC of tiamulin with respect to the control strain (Table 3). In a comparable manner,



a 4-32 fold MIC increase with respect to the control was recorded for the same isolates when exposed to thiamphenicol (Table 3). All isolates had a MIC for clindamycin  $\geq 256$   $\mu\text{g/mL}$  due to presence of the methylase ErmB<sup>(18,19)</sup>, unpublished data). Despite carrying a *cfr*(B) gene, the MICs of linezolid, tiamulin, and thiamphenicol obtained for the Chilean isolates PUC51 and PUC347 were at least 2-4 fold lower than those obtained for the other test isolates, yet MIC of linezolid and tiamulin were still at least 12 fold higher than the MIC obtained for the LIBA5701 control (Table 3).

### 3.3 Functional analysis of Cfr(C)

To investigate whether Cfr(C) is a C8-methylating enzyme, we overexpressed in *Escherichia coli* a codon-optimized version of the *cfr*(C) sequence of HON10/LIBA5707. The resulting protein was purified under anaerobic conditions and its iron-sulfur cluster reconstituted. Thereafter, we performed an *in vitro* methylation assay with either *in vitro* transcribed 23S rRNA *E. coli* or *C. difficile* fragments and [<sup>14</sup>C-methyl]-S-adenosyl methionine ([<sup>14</sup>C-methyl]-SAM), and the amount of radioactivity incorporated into the RNA product was determined. This assay revealed that Cfr(C) can methylate *E. coli* and *C. difficile* 23S rRNA *in vitro* (Figure 2). However, while significantly above the background, the methylation level detected in the 2447-2625 rRNA fragment of *E. coli* or the 2451-2629 fragment of *C. difficile* was lower than that observed in the reaction of 23S rRNA fragments with *E. coli* RlmN (Figure 2).

To establish the regioselectivity of the modification on the adenosine ring by Cfr(C), radiolabeled RNA product isolated from the *in vitro* assay with *E. coli* RNA was purified, digested to individual nucleosides, and analyzed by HPLC. Unlike the 2-methyladenosine product of the reaction with *E. coli* RlmN, the product of the reaction with purified Cfr(C) co-eluted with the 8-methyladenosine standard, indicating that this enzyme methylates A2503 at the C8 position (Figure 3).

## 4. Discussion

We investigated seven clinical *C. difficile* strains from Latin America that circulated between 2009 and 2016 to determine whether they carry functional *cfr* or *cfr*-like genes. Analysis of their draft WGS indicated the presence of various alleles of *cfr*-like genes, while phylogenetic analysis suggested the presence of a new Cfr-like clade comprised of Cfr(C) and a putative Cfr-like sequence.

229 We provide for the first-time *in vitro* evidence of the RNA methylation activity of Cfr(C). Combined with  
 230 the observation of a PhLOPS<sub>A</sub> phenotype in isolate DF11, the clustering of this novel putative *cfr*-like  
 231 sequence with Cfr(C) suggests that its product could be a Cfr methylating enzyme implicated in  
 232 antibiotic resistance. This hypothesis is yet to be experimentally verified.

233 The finding of *cfr*-like genes in various types of MGEs with partial hits to genomic sequences reported  
 234 for other intestinal Firmicutes lends evidence for the plasticity of the *C. difficile* genome<sup>32</sup> and supports  
 235 the role of this pathogen as a reservoir of resistance genes in the human gut<sup>33</sup>. This situation is  
 236 worrisome because linezolid is used for the treatment of methicillin-resistant *Staphylococcus aureus*<sup>34</sup>  
 237 and vancomycin-resistant enterococci<sup>35</sup>, which reside in the same Phylum as clostridial organisms.

238 Indeed, versions of Tn6218, such as those detected in isolates HON06 and HON10, have been found  
 239 among *Enterococcus faecium* isolates from German hospital patients<sup>36</sup>.

240 The widespread detection of *cfr*-like genes among various epidemic NAP1/RT027/ST01 strains  
 241 deserves attention to clarify whether this situation contributes to virulence. This notion is reinforced by  
 242 the fact that linezolid and moxifloxacin resistance, a marker of highly virulent *C. difficile* strains, are  
 243 often linked in this ribotype<sup>37</sup>. Furthermore, since antibiotics are crucial both for the induction,  
 244 progression, and treatment of CDI, multidrug-resistance (MDR) is particularly worrisome when present  
 245 in epidemic types such as the NAP1/027/ST01 strain, which has been linked to severe disease and CDI  
 246 outcomes<sup>38</sup>.

247 Although the *cfr*(B) allele of isolates HON06, HON11, PUC51, and PUC347 is identical, the last two  
 248 isolates did not show a strong PhLOPS<sub>A</sub> phenotype. It has been shown that Cfr(B) is functional when  
 249 encoded by Tn6218<sup>10,13</sup>, hence we propose that this gene is not as active in PUC51 and PUC347  
 250 possibly due to genomic neighborhood effects or the lack of HTH transcriptional factors and RNA  
 251 polymerase sigma factors seen in all other MGEs here reported. Proteins from these families commonly  
 252 participate in gene expression regulation, and in *C. boltae* 90B3, *cfr*(C) is co-transcribed with the gene  
 253 for a putative HTH DNA binding protein<sup>12</sup>.

254 To further support the role of *cfr*-like enzymes in antibiotic resistance, we have provided the first *in vitro*  
 255 evidence that Cfr(C) methylates the C8 position in A2503 of *E. coli* 23S rRNA and in A2508 of *C.*

256 *difficile* 23S rRNA. In this regard, the poor activity of Cfr(C) towards the assayed rRNA fragments could  
 257 reflect differences in substrate requirements between Cfr(C) and *E. coli* RlmN<sup>26</sup> or result from the lack  
 258 of other modifications in the RNA substrate that are necessary for efficient methylation by Cfr(C).  
 259 Our results likely reflect the unique patterns of antibiotic consumption that distinguish Latin America<sup>39</sup>.  
 260 Therefore, it would be worthwhile to analyze additional resistance phenotypes in strain collections from  
 261 this region. This can be achieved through a combination of classical phenotypic tests, whole genome  
 262 sequencing, and biochemical validation, as exemplified here. As already noted<sup>40</sup>, a prompt phenotypic  
 263 and genotypic identification of resistance genes, effective antimicrobial stewardship and infection  
 264 control programs, and alternative therapies are needed to prevent and contain the spread of MDR *C.*  
 265 *difficile* strains.

266

## 267 **Declarations**

## 268 **Funding**

269 This work was supported by the NIAID grant R01AI137270 to D.G.F, funds from the Vicerrectory of  
 270 Research of the University of Costa Rica to C.R, the Millennium Science Initiative of the Ministry of  
 271 Economy, Development and Tourism, grant “Nucleus in the Biology of Intestinal Microbiota”, Comisión  
 272 Nacional de Ciencia y Tecnología de Chile (FONDECYT Grant 1151025) to D.P-S, and Fondef ID18|  
 273 10230 IDeA I+D 2018 and EULACH16/FONIS T020076 to D.P-S and M.P-G.

274

## 275 **Competing Interests**

276 None

## 277 **Ethical Approval**

278 None

279

## 280 **References**

281 1. Wilson DN. Ribosome-targeting antibiotics and mechanisms of bacterial resistance. *Nat Rev*  
 282 *Microbiol* 2014; **12**: 35–48. Available at: <http://www.nature.com/articles/nrmicro3155>.

- 283 2. Roberts M. Mechanisms of MLS resistance. 2017: 2. Available at:
- 284 <http://faculty.washington.edu/marilynr/ermwebA.pdf>. Accessed July 13, 2018.
- 285 3. Vester B. The *cfr* and *cfr*-like multiple resistance genes. *Res Microbiol* 2018; **169**: 61–6. Available at:
- 286 <http://linkinghub.elsevier.com/retrieve/pii/S0923250818300056>.
- 287 4. Long KS, Poehlsgaard J, Kehrenberg C, Schwarz S, Vester B. The Cfr rRNA methyltransferase
- 288 confers resistance to phenicols, lincosamides, oxazolidinones, pleuromutilins, and streptogramin A
- 289 antibiotics. *Antimicrob Agents Chemother* 2006; **50**: 2500–5. Available at:
- 290 <http://aac.asm.org/cgi/doi/10.1128/AAC.00131-06>.
- 291 5. Smith LK, Mankin AS. Transcriptional and translational control of the *mlr* operon, which confers
- 292 resistance to seven classes of protein synthesis inhibitors. *Antimicrob Agents Chemother* 2008; **52**:
- 293 1703–12. Available at: <http://aac.asm.org/cgi/doi/10.1128/AAC.01583-07>.
- 294 6. Polikanov YS, Starosta AL, Juetz MF, *et al.* Distinct tRNA accommodation intermediates observed
- 295 on the ribosome with the antibiotics hygromycin A and A201A. *Mol Cell* 2015; **58**: 832–44. Available at:
- 296 <http://linkinghub.elsevier.com/retrieve/pii/S1097276515002701>.
- 297 7. LaMarre JM, Locke JB, Shaw KJ, Mankin AS. Low fitness cost of the multidrug resistance gene *cfr*.
- 298 *Antimicrob Agents Chemother* 2011; **55**: 3714–9. Available at:
- 299 <http://aac.asm.org/lookup/doi/10.1128/AAC.00153-11>.
- 300 8. Schwarz S, Werckenthin C, Kehrenberg C. Identification of a plasmid-borne chloramphenicol-
- 301 florfenicol resistance gene in *Staphylococcus sciuri*. *Antimicrob Agents Chemother* 2000; **44**: 2530–3.
- 302 Available at: <http://aac.asm.org/cgi/doi/10.1128/AAC.44.9.2530-2533.2000>.
- 303 9. Hansen LH, Planellas MH, Long KS, Vester B. The Order Bacillales hosts functional homologs of the
- 304 worrisome *cfr* antibiotic resistance gene. *Antimicrob Agents Chemother* 2012; **56**: 3563–7. Available at:
- 305 <http://aac.asm.org/lookup/doi/10.1128/AAC.00673-12>.
- 306 10. Marín M, Martín A, Alcalá L, *et al.* *Clostridium difficile* isolates with high linezolid MICs harbor the
- 307 multiresistance gene *cfr*. *Antimicrob Agents Chemother* 2015; **59**: 586–9. Available at:
- 308 <http://aac.asm.org/lookup/doi/10.1128/AAC.04082-14>.
- 309 11. Schwarz S, Wang Y. Nomenclature and functionality of the so-called *cfr* gene from *Clostridium*

- 310 *difficile*. *Antimicrob Agents Chemother* 2015; **59**: 2476–7. Available at:
- 311 <http://aac.asm.org/lookup/doi/10.1128/AAC.04893-14>.
- 312 12. Candela T, Marvaud J-C, Nguyen TK, Lambert T. A *cfr*-like gene *cfr*(C) conferring linezolid
- 313 resistance is common in *Clostridium difficile*. *Int J Antimicrob Agents* 2017; **50**: 496–500. Available at:
- 314 <http://linkinghub.elsevier.com/retrieve/pii/S0924857917301930>.
- 315 13. Hansen LH, Vester B. A *cfr*-Like gene from *Clostridium difficile* confers multiple antibiotic resistance
- 316 by the same mechanism as the *cfr* gene. *Antimicrob Agents Chemother* 2015; **59**: 5841–3. Available at:
- 317 <http://aac.asm.org/lookup/doi/10.1128/AAC.01274-15>.
- 318 14. Valerio M, Pedromingo M, Muñoz P, *et al*. Potential protective role of linezolid against *Clostridium*
- 319 *difficile* infection. *Int J Antimicrob Agents* 2012; **39**: 414–9. Available at:
- 320 <http://linkinghub.elsevier.com/retrieve/pii/S0924857912000465>.
- 321 15. Baines SD, Noel AR, Huscroft GS, *et al*. Evaluation of linezolid for the treatment of *Clostridium*
- 322 *difficile* infection caused by epidemic strains using an in vitro human gut model. *J Antimicrob*
- 323 *Chemother* 2011; **66**: 1537–46. Available at:
- 324 <https://academic.oup.com/jac/article-lookup/doi/10.1093/jac/dkr155>.
- 325 16. Chilton CH, Crowther GS, Baines SD, *et al*. *In vitro* activity of cadazolid against clinically relevant
- 326 *Clostridium difficile* isolates and in an *in vitro* gut model of *C. difficile* infection. *J Antimicrob Chemother*
- 327 2014; **69**: 697–705. Available at: <https://academic.oup.com/jac/article-lookup/doi/10.1093/jac/dkt411>.
- 328 17. Anon. [https://www.pharmaceutical-technology.com/comment/jj-discontinues-development-c-difficile-](https://www.pharmaceutical-technology.com/comment/jj-discontinues-development-c-difficile-antibiotic-cadazolid/)
- 329 [antibiotic-cadazolid/](https://www.pharmaceutical-technology.com/comment/jj-discontinues-development-c-difficile-antibiotic-cadazolid/). Date of las access: April 29, 2019
- 330 18. Ramírez-Vargas G, Quesada-Gómez C, Acuña-Amador L, *et al*. A *Clostridium difficile* lineage
- 331 endemic to Costa Rican hospitals is multidrug resistant by acquisition of chromosomal mutations and
- 332 novel mobile genetic elements. *Antimicrob Agents Chemother* 2017; **61**. Available at:
- 333 <http://aac.asm.org/lookup/doi/10.1128/AAC.02054-16>.
- 334 19. Hidalgo-Villeda F, Tzoc E, Torres L, Bu E, Rodríguez C, Quesada-Gómez C. Diversity of multidrug-
- 335 resistant epidemic *Clostridium difficile* NAP1/RT027/ST01 strains in tertiary hospitals from Honduras.
- 336 *Anaerobe* 2018; **52**: 75–8. Available at:

337 <https://linkinghub.elsevier.com/retrieve/pii/S1075996418301045>.

338 20. CLSI. *Performance Standards for Antimicrobial Susceptibility Testing*. 28th ed. CLSI supplement  
339 M100. Wayne, PA: Clinical and Laboratory Standards Institute; 2018

340 21. Bankevich A, Nurk S, Antipov D, *et al*. SPAdes: A new genome assembly algorithm and its  
341 applications to single-cell sequencing. *J Comput Biol* 2012; **19**: 455–77. Available at:  
342 <http://www.liebertpub.com/doi/10.1089/cmb.2012.0021>.

343 22. Seemann T. Prokka: rapid prokaryotic genome annotation. *Bioinformatics* 2014; **30**: 2068–9.  
344 Available at: <https://academic.oup.com/bioinformatics/article-lookup/doi/10.1093/bioinformatics/btu153>.

345 23. Huerta-Cepas J, Forslund K, Coelho LP, *et al*. Fast genome-wide functional annotation through  
346 orthology assignment by eggNOG-Mapper. *Mol Biol Evol* 2017; **34**: 2115–22. Available at:  
347 <https://academic.oup.com/mbe/article/34/8/2115/3782716>.

348 24. Jia B, Raphenya AR, Alcock B, *et al*. CARD 2017: expansion and model-centric curation of the  
349 comprehensive antibiotic resistance database. *Nucleic Acids Res* 2017; **45**: D566–73. Available at:  
350 <https://academic.oup.com/nar/article-lookup/doi/10.1093/nar/gkw1004>.

351 25. Long KS, Vester B. Resistance to linezolid caused by modifications at its binding site on the  
352 ribosome. *Antimicrob Agents Chemother* 2012; **56**: 603–12. Available at: <http://aac.asm.org/lookup/doi/10.1128/AAC.05702-11>.

353 26. Yan F, LaMarre JM, Röhrich R, *et al*. RlmN and Cfr are radical SAM enzymes involved in  
354 methylation of ribosomal RNA. *J Am Chem Soc* 2010; **132**: 3953–64. Available at:  
355 <http://pubs.acs.org/doi/abs/10.1021/ja910850y>.

356 27. Stojković V, Noda-Garcia L, Tawfik DS, Fujimori DG. Antibiotic resistance evolved via inactivation of  
357 a ribosomal RNA methylating enzyme. *Nucleic Acids Res* 2016; **44**: 8897–907. Available at:  
358 <https://academic.oup.com/nar/article-lookup/doi/10.1093/nar/gkw699>.

359 28. Edgar RC. MUSCLE: multiple sequence alignment with high accuracy and high throughput. *Nucleic*  
360 *Acids Res* 2004; **32**: 1792–7. Available at: [https://academic.oup.com/nar/article-lookup/doi/10.1093/nar/](https://academic.oup.com/nar/article-lookup/doi/10.1093/nar/gkh340)  
361 [gkh340](https://academic.oup.com/nar/article-lookup/doi/10.1093/nar/gkh340).

362 29. Guindon S, Gascuel O. A simple, fast, and accurate algorithm to estimate large phylogenies by  
363



364 maximum likelihood. *Syst Biol* 2003; **52**: 696–704. Available at:  
365 <http://www.ncbi.nlm.nih.gov/pubmed/14530136>.

366 30. Lanz ND, Grove TL, Gogonea CB, Lee K-H, Krebs C, Booker SJ. RlmN and AtsB as Models for the  
367 overproduction and characterization of radical SAM proteins. In: *Methods in Enzymology*, 2012;  
368 516:125–52. Available at: <http://linkinghub.elsevier.com/retrieve/pii/B9780123942913000307>.

369 31. Stojković V, Fujimori DG. Radical SAM-mediated methylation of ribosomal RNA. In: *Methods in*  
370 *Enzymology*, 2015; 560:355–76. Available at:  
371 <http://linkinghub.elsevier.com/retrieve/pii/S0076687915002281>.

372 32. Knight DR, Elliott B, Chang BJ, Perkins TT, Riley T V. Diversity and evolution in the genome of  
373 *Clostridium difficile*. *Clin Microbiol Rev* 2015; **28**: 721–41. Available at:  
374 <http://cmr.asm.org/lookup/doi/10.1128/CMR.00127-14>.

375 33. Johanesen P, Mackin K, Hutton M, et al. Disruption of the gut microbiome: *Clostridium difficile*  
376 infection and the threat of antibiotic resistance. *Genes (Basel)* 2015; **6**: 1347–60. Available at:  
377 <http://www.mdpi.com/2073-4425/6/4/1347>.

378 34. Watkins R, Lemonovich, File T. An evidence-based review of linezolid for the treatment of  
379 methicillin-resistant *Staphylococcus aureus* (MRSA): place in therapy. *Core Evid* 2012: 131. Available  
380 at: [http://www.dovepress.com/an-evidence-based-review-of-linezolid-for-the-treatment-of-methicillin-](http://www.dovepress.com/an-evidence-based-review-of-linezolid-for-the-treatment-of-methicillin-peer-reviewed-article-CE)  
381 [peer-reviewed-article-CE](http://www.dovepress.com/an-evidence-based-review-of-linezolid-for-the-treatment-of-methicillin-peer-reviewed-article-CE).

382 35. Chuang Y-C, Wang J-T, Lin H-Y, Chang S-C. Daptomycin versus linezolid for treatment of  
383 vancomycin-resistant enterococcal bacteremia: systematic review and meta-analysis. *BMC Infect Dis*  
384 2014; **14**: 687. Available at: <http://bmcinfectdis.biomedcentral.com/articles/10.1186/s12879-014-0687-9>.

385 36. Bender JK, Fleige C, Klare I, et al. Detection of a *cfr*(B) variant in German *Enterococcus faecium*  
386 clinical isolates and the impact on linezolid resistance in *Enterococcus* spp. Rohde H, ed. *PLoS One*  
387 2016; **11**: e0167042. Available at: <http://dx.plos.org/10.1371/journal.pone.0167042>.

388 37. Freeman J, Vernon J, Vickers R, Wilcox MH. Susceptibility of *Clostridium difficile* isolates of varying  
389 antimicrobial resistance phenotypes to SMT19969 and 11 comparators. *Antimicrob Agents Chemother*  
390 2016; **60**: 689–92. Available at: <http://aac.asm.org/lookup/doi/10.1128/AAC.02000-15>.

38. See I, Mu Y, Cohen J, et al. NAP1 strain type predicts outcomes from *Clostridium difficile* infection. *Clin Infect Dis* 2014; **58**: 1394–400. Available at: <https://academic.oup.com/cid/article-lookup/doi/10.1093/cid/ciu125>.
39. Wirtz VJ, Dreser A, Gonzales R. Trends in antibiotic utilization in eight Latin American countries, 1997-2007. *Rev Panam Salud Publica* 2010; **27**: 219–25. Available at: <http://www.ncbi.nlm.nih.gov/pubmed/20414511>.
40. Spigaglia P. Recent advances in the understanding of antibiotic resistance in *Clostridium difficile* infection. *Ther Adv Infect Dis* 2016; **3**: 23–42. Available at: <http://journals.sagepub.com/doi/10.1177/2049936115622891>.



## 400 Figure legends

401

402 **Figure 1.** Evolutionary relationship of RlmN and Cfr sequences from selected Firmicutes species.

403 Functionally characterized Cfrs, Cfr-like proteins, Cfr divergent proteins, and known and putative RlmNs  
 404 sequences are marked. While Cfr-like proteins clade with known Cfrs lacking functional  
 405 characterization, Cfr-divergent proteins diverged early in evolutionary time and do not clade with either  
 406 Cfrs or RlmNs. The enzymes of isolates *C. difficile* HON10/LIBA5707 and DF11 appear highlighted in  
 407 bold. The distance scale underneath the tree indicates the average number of substitutions per site.  
 408 IMG/JGI database identifiers or accession numbers of protein sequences used in the tree are provided  
 409 in Supplementary Table 2.

410

411 **Figure 2.** Cfr(C) and *E. coli* RlmN-mediated methylation of *in vitro* transcribed *E. coli* 2447-2625 23S

412 rRNA fragment (A). Cfr(C)-mediated methylation of *in vitro* transcribed *E. coli* and *C. difficile* 23S rRNA  
 413 fragments (B). Bars represent the mean of at least two replicates  $\pm$  s.d.

414

415 **Figure 3.** HPLC analysis of methylation products from Cfr(C) (blue) and *E. coli* RlmN reactions ( $m^2A$ ,

416 green) with *E. coli* 2447-2625 rRNA fragment. A  $m^8A$  standard is shown in orange.

417 **Table 1.** *cfr*-like genes detected

| Isolate  | Origin/Year of isolation | Type (PFGE/RT/ST)            | PFGE pattern <sup>a</sup> | % identity to reference sequence(s) <sup>c</sup>                                                                                                                    | <i>cfr</i> -like gene detected <sup>d</sup> | Previous detection in <i>C. difficile</i> |
|----------|--------------------------|------------------------------|---------------------------|---------------------------------------------------------------------------------------------------------------------------------------------------------------------|---------------------------------------------|-------------------------------------------|
| HON06    | CDI/Honduras/2016        | NAP1/027/ST01                | 1057                      | Cfr(B) KM359438 (99-100%)<br>Cfr(B) KR610408 (99-100%)                                                                                                              | <i>cfr</i> (B)                              | Strain 11140508 (KM359438)                |
| HON11    | CDI/Honduras/2016        |                              | 0461                      |                                                                                                                                                                     |                                             |                                           |
| PUC51    | CDI/Chile/2011           |                              | ND <sup>b</sup>           |                                                                                                                                                                     |                                             |                                           |
| PUC347   | CDI/Chile/2011           |                              | ND                        |                                                                                                                                                                     |                                             |                                           |
| HON10    | CDI/Honduras/2016        | NAP1/027/ST01                | 1056                      | Cfr(C) CCL89685 (100%)                                                                                                                                              | <i>cfr</i> (C)                              | Strain T10 (CCL89685)                     |
| LIBA5707 | CDI/Costa Rica/2009      | NAP <sub>CR1</sub> /012/ST54 | 448                       | Cfr(C) ENZ41453 (100%)                                                                                                                                              |                                             |                                           |
| DF11     | CDI/Mexico/2015          | NAP1/027/ST01                | 1058                      | Cfr 879565 (51%)<br>Cfr AM408573 (51%)<br>Cfr(B) KM359438 (53%)<br>Cfr(B) KR610408 (54%)<br>Cfr(C) CCL89685 (58%)<br>Cfr(C) ENZ41453 (58%)<br>Cfr(D) MG707078 (51%) | Putative <i>cfr</i> -like gene              | No                                        |

- 418
- 419 <sup>a</sup>NML-Canada database
- 420 <sup>b</sup>Not determined
- 421 <sup>c</sup>MLS nomenclature (<https://faculty.washington.edu/marilynr/ermweb1.pdf>)
- 422 <sup>d</sup>80% identity threshold

423 **Table 2.** Annotation of the putative mobile genetic elements (MGE) in which *cfr*-like genes were detected

424

| Isolate(s)     | Element synteny                                                                                                                                                                                                                                                                                                                                                        | Cfr type | MGE type                   | Insertion site                                                               |
|----------------|------------------------------------------------------------------------------------------------------------------------------------------------------------------------------------------------------------------------------------------------------------------------------------------------------------------------------------------------------------------------|----------|----------------------------|------------------------------------------------------------------------------|
| HON06/HON11    | Transposase – Excisionase – Replication initiation factor - Transcriptional regulator - Methyltransferase - HTH-type transcriptional regulator - Hypothetical protein - <b>Cfr-like protein</b> - MATE efflux protein - RNA polymerase sigma factor - HTH-domain containing protein - Hypothetical protein - HTH-type transcriptional regulator - Hypothetical protein | Cfr(B)   | Tn6218-like <sup>a</sup>   | Between genes for a hypothetical protein and a HTH transcriptional regulator |
| PUC51/PUC347   | Transposase - <b>Cfr-like protein</b> - Integrase - RNA methylase - Hypothetical protein - endonuclease - Hypothetical protein - Mobilization protein - Helicase                                                                                                                                                                                                       |          | Undescribed                |                                                                              |
| HON10/LIBA5707 | Resolvase - Resolvase - Hypothetical protein - Hypothetical protein - RNA polymerase sigma factor - <b>Cfr-like protein</b> - Hypothetical protein - Hypothetical protein - Transcriptional regulator - HTH transcriptional regulator - Relaxase                                                                                                                       | Cfr(C)   | F548-like ICE <sup>b</sup> | Gene for ABC transporter permease                                            |

---

---

|      |                                                                                                                                                                                                          |                                |             |                                        |
|------|----------------------------------------------------------------------------------------------------------------------------------------------------------------------------------------------------------|--------------------------------|-------------|----------------------------------------|
| DF11 | DNA invertase - Recombinase - Hypothetical protein - N-acetyltransferase - ABC transporter ATP binding protein – <b>Putative Cfr-like protein</b> - HTH transcriptional regulator - Hypothetical protein | Putative <i>cfr</i> -like gene | Undescribed | Gene for adenine deaminase <i>adeC</i> |
|------|----------------------------------------------------------------------------------------------------------------------------------------------------------------------------------------------------------|--------------------------------|-------------|----------------------------------------|

---

425

426 <sup>a</sup>Accession number for Tn6218 in *C. difficile* Ox2167: HG002396.1

427 <sup>b</sup>Accession number for *C. difficile* F548 assembly: GCA\_000452325.2

428 **Table 3.** Minimum inhibitory concentrations of various PTC-targeting antibiotics

429

| Isolate               | <i>cfr</i> -like gene          | MGE type    | MIC (µg/ml)     |           |          |               |
|-----------------------|--------------------------------|-------------|-----------------|-----------|----------|---------------|
|                       |                                |             | Clindamycin     | Linezolid | Tiamulin | Thiamphenicol |
| HON06                 | <i>cfr</i> (B)                 | Tn6218-like | ≥256            | 24        | 128      | ≥256          |
| HON11                 |                                |             | ≥256            | 24        | 128      | ≥256          |
| PUC51                 |                                | Undescribed | ND <sup>a</sup> | 2         | 4        | 4             |
| PUC347                |                                |             | ND              | 2         | 16       | 8             |
| HON10                 | <i>cfr</i> (C)                 | ICEs        | ≥256            | 24        | 128      | ≥256          |
| LIBA5707              |                                |             | ≥256            | 8         | ≥256     | ≥256          |
| DF11                  | Putative <i>cfr</i> -like gene | Undescribed | ≥256            | ≥256      | 32       | 32            |
| LIBA5701 <sup>b</sup> | None                           | --          | ≥256            | <0.16     | <0.16    | 8             |

430

431 <sup>a</sup>Not determined

432 <sup>b</sup>NAP<sub>CR1</sub> strain lacking *cfr*-like genes used as negative control

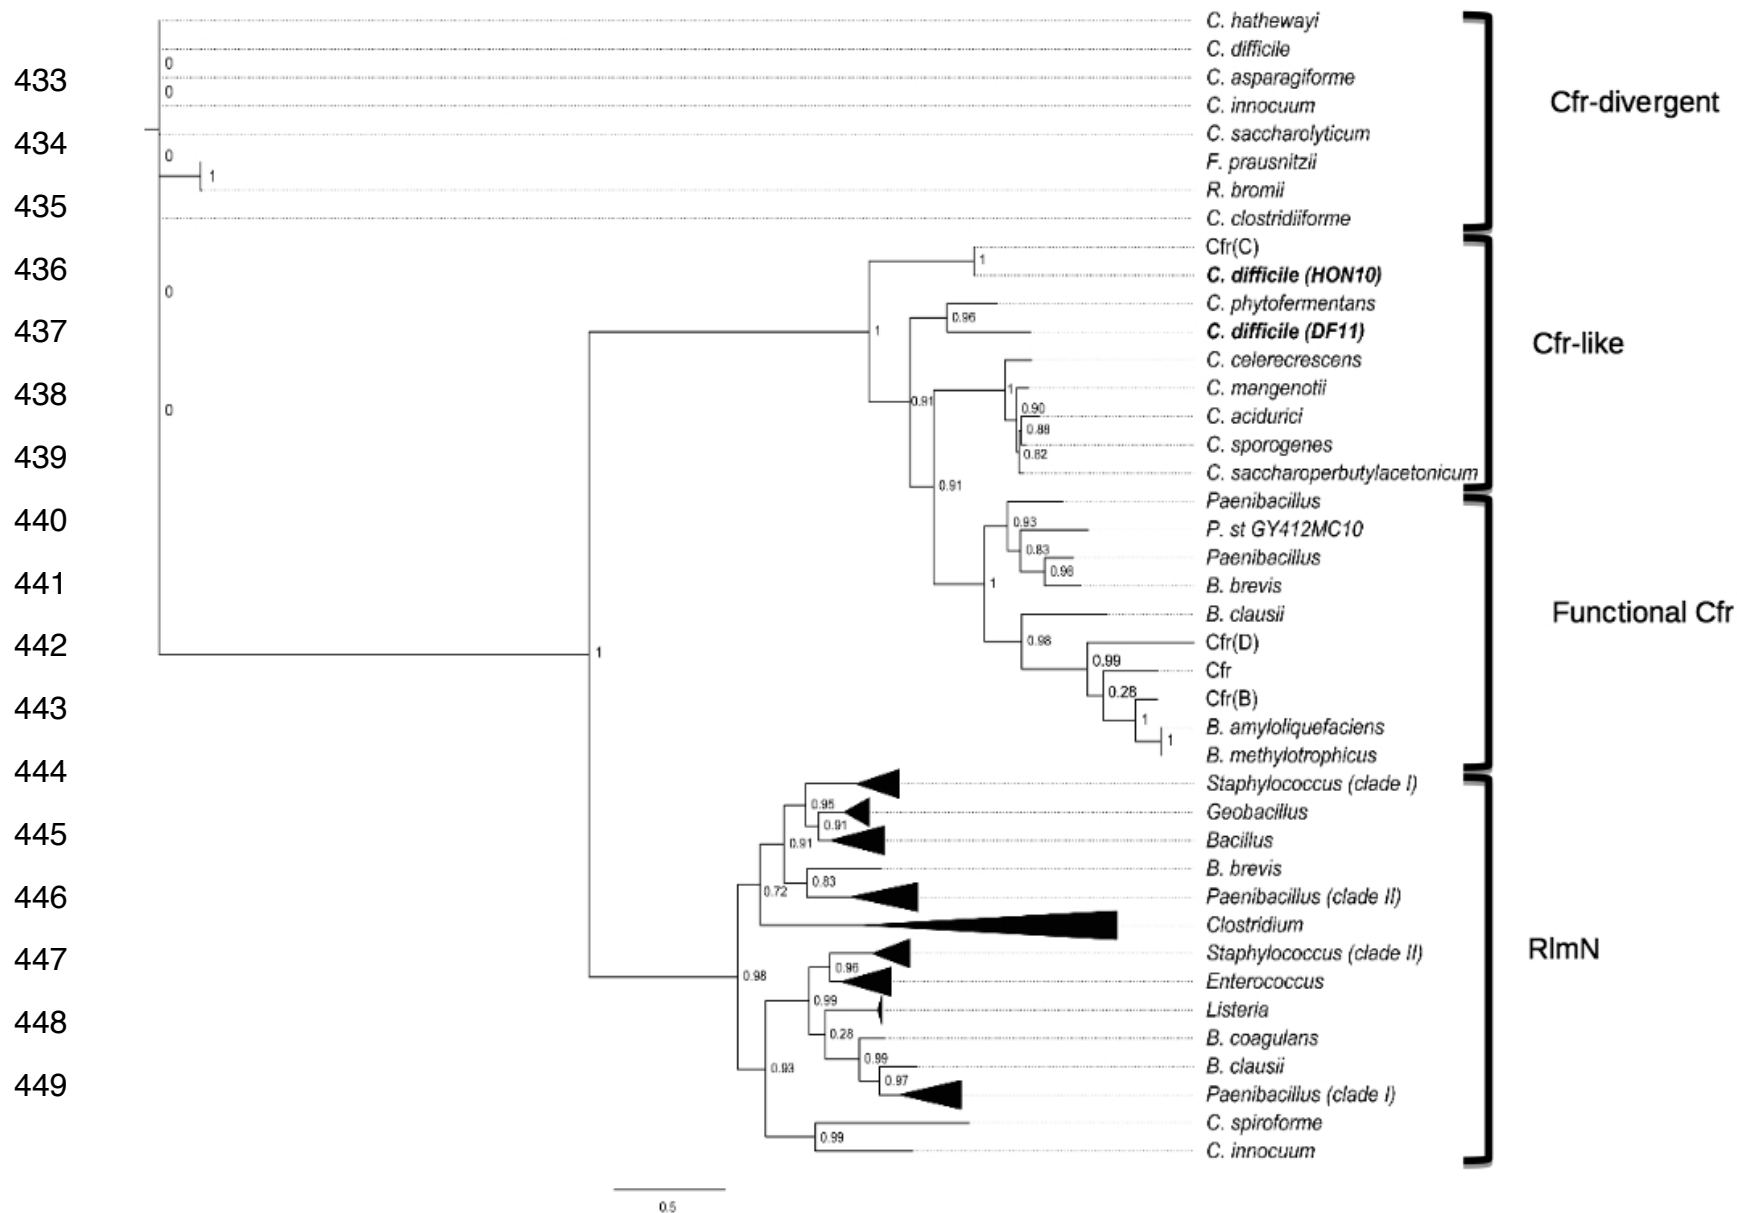

Fig1

452  
453  
454 Fig2

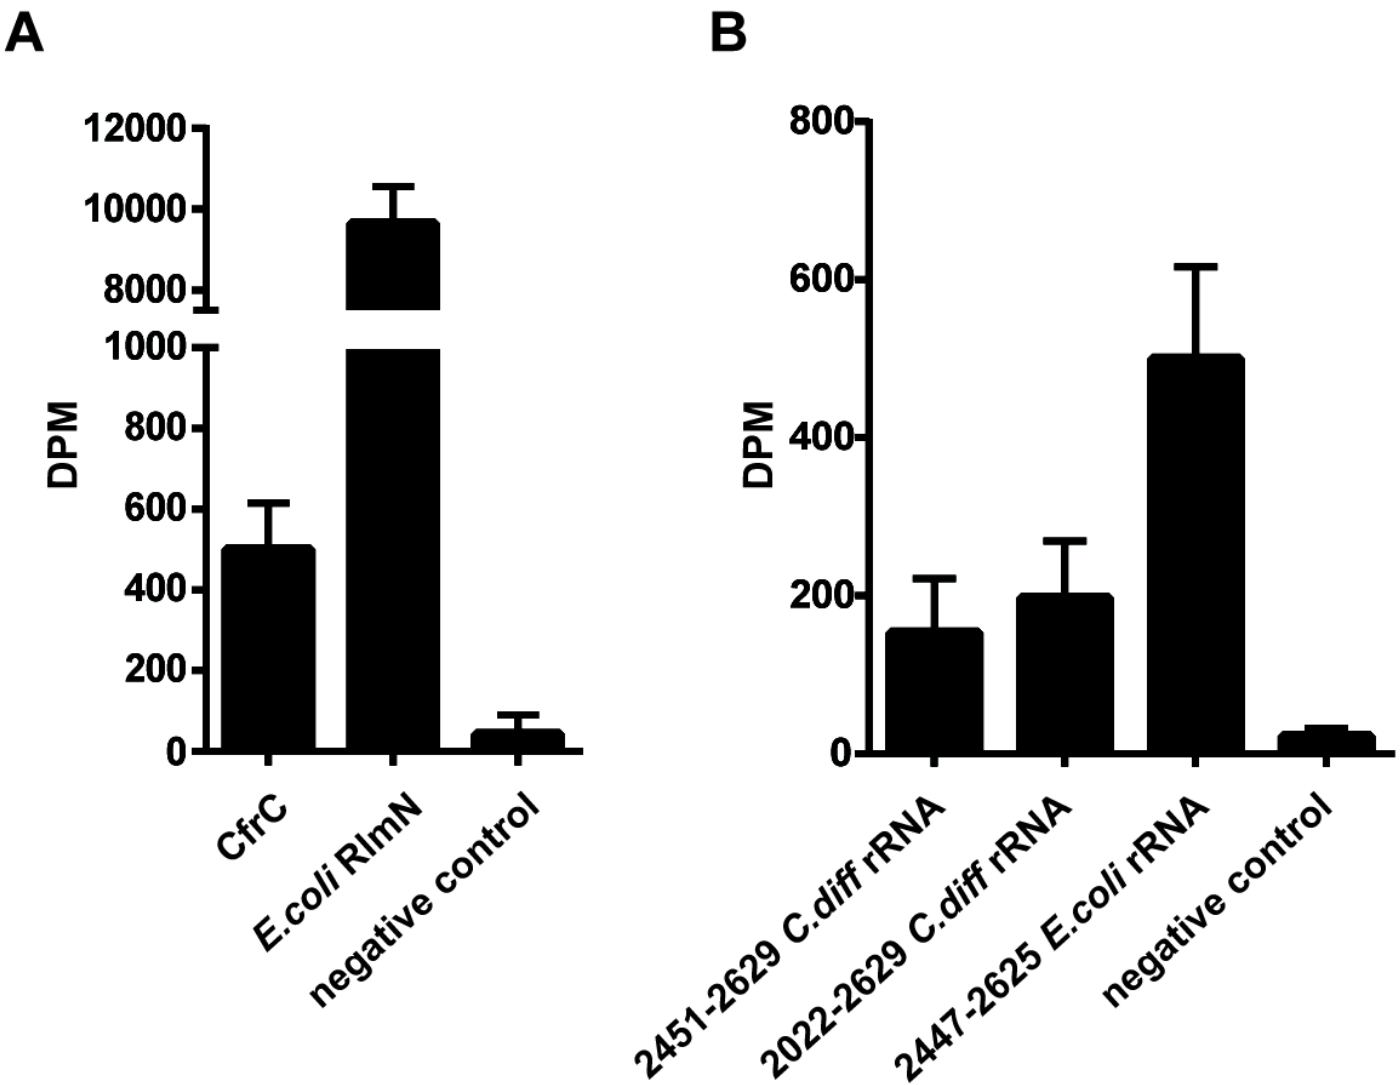

473  
474  
475  
476 Fig 3  
477  
478

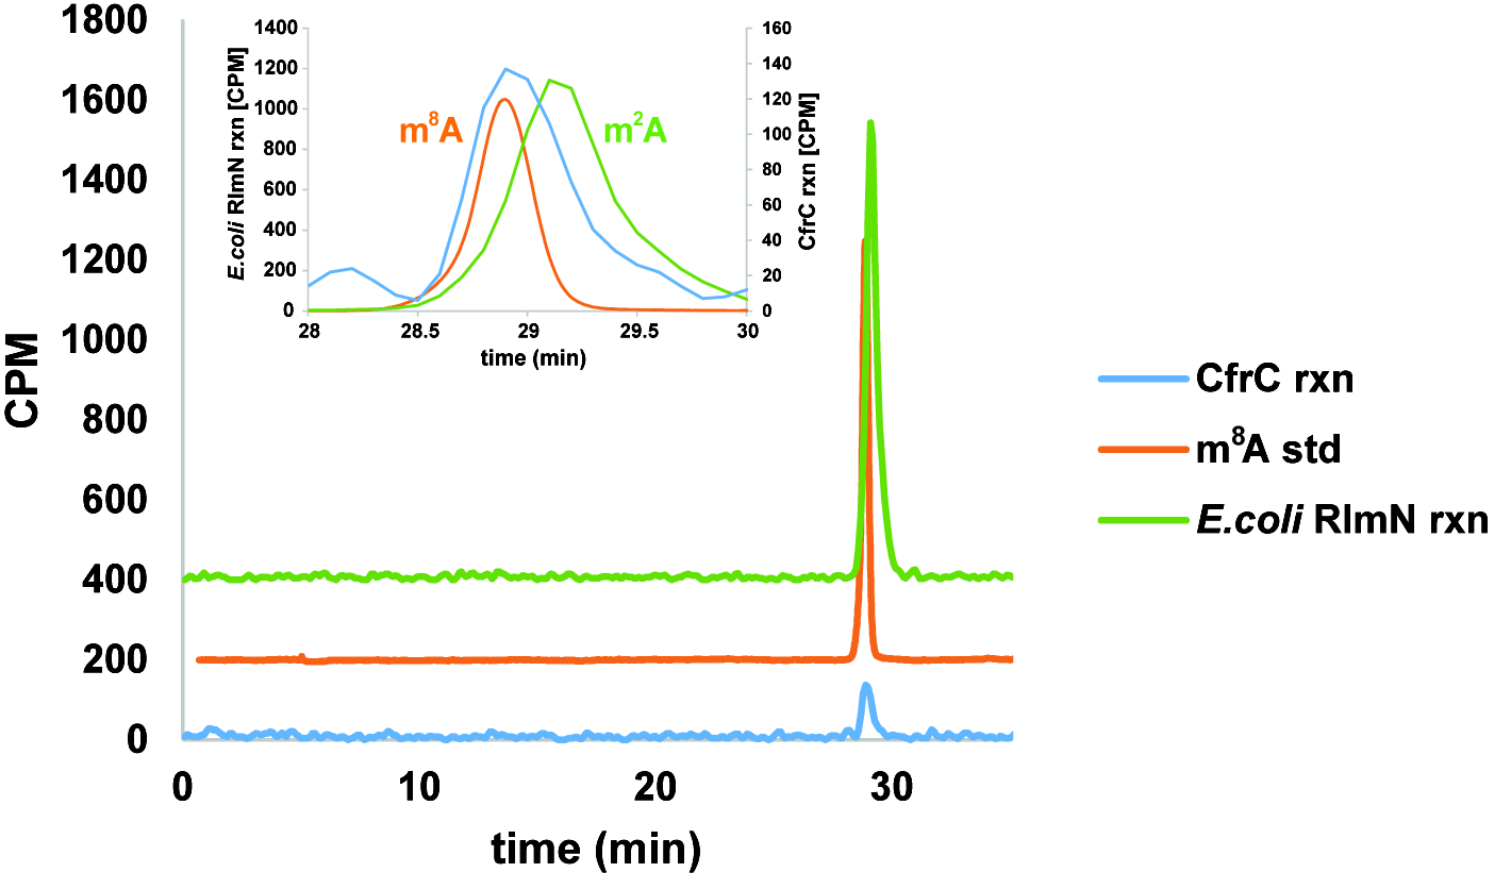

Source: https://www.biorxiv.org/content/biorxiv/early/2019/05/24/649020.full.pdf
